# Supplementary material for: LncRNA lncLy6C induced by microbiota metabolite butyrate promotes differentiation of Ly6Chigh to Ly6Cint/neg macrophages through lncLy6C/C/EBPβ/Nr4A1 axis
Source: PubMed Central journal article supplement (PMC7683537; doi:10.1038/s41421-020-00211-8), 2020-11-24
Supplement: 41421_2020_211_MOESM1_ESM.pdf [file 41421_2020_211_MOESM1_ESM.pdf]

**LncRNA *lncLy6C* induced by microbiota metabolite butyrate promotes differentiation of Ly6C<sup>high</sup> to Ly6C<sup>int/neg</sup> macrophages through *lncLy6C* /C/EBP $\beta$ /Nr4A1 axis**

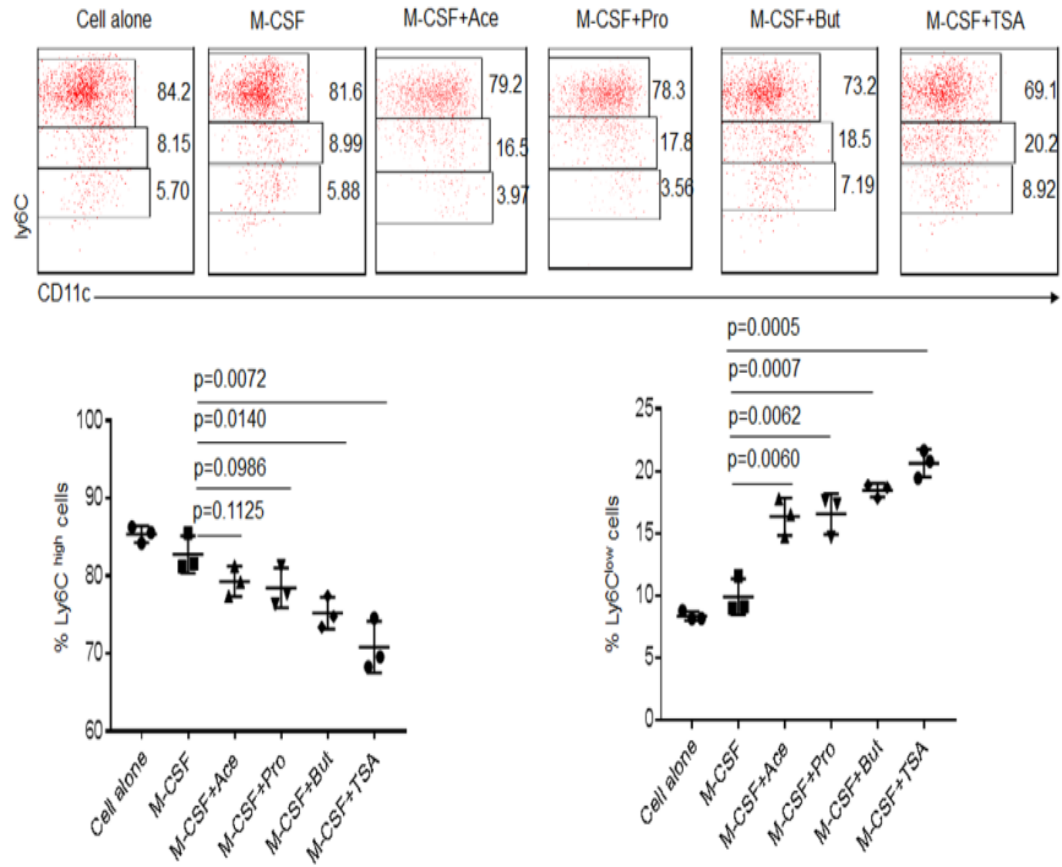

**Fig. S1.** Flow cytometry of CD117<sup>-</sup>CD11b<sup>+</sup>CD115<sup>+</sup>Ly6C<sup>+</sup> BM monocytes after exposed to acetic acid (Ace, 200  $\mu$ M), propionic acid (Pro, 200  $\mu$ M), butyrate (But, 200  $\mu$ M) and Trichostatin (TSA, 40 nM) for 2 days. % of Ly6C<sup>high</sup> and Ly6C<sup>low</sup> cells was compared (lower). Two side Student's *t*-test.

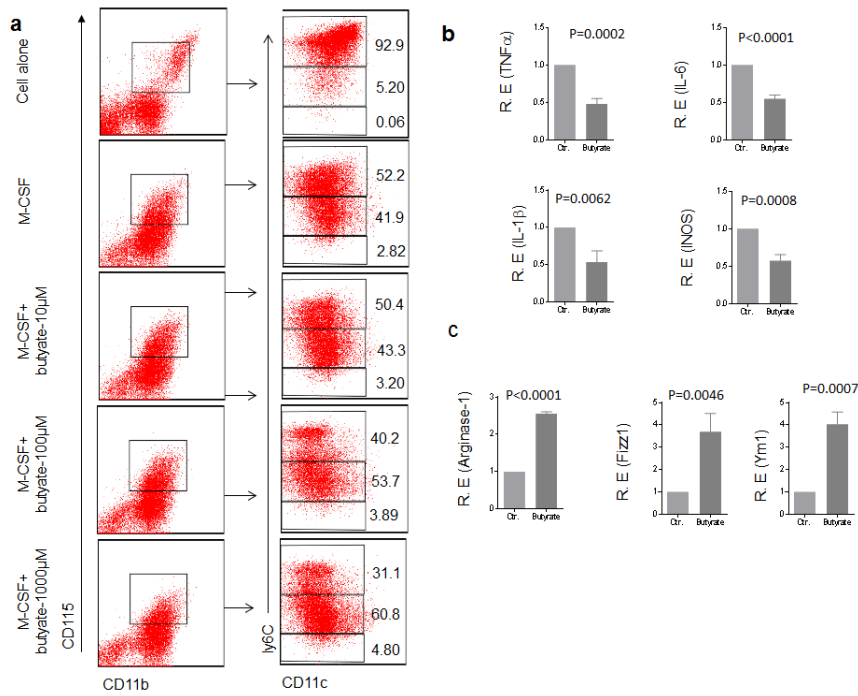

**Fig. S2. Characteristics of CD117<sup>-</sup> CD11b<sup>+</sup> CD115<sup>+</sup> Ly6C<sup>+</sup> BM monocytes after**

**exposed to butyrate. a**, Flow cytometry of CD117<sup>-</sup> CD11b<sup>+</sup> CD115<sup>+</sup> Ly6C<sup>+</sup> BM monocytes after exposed to different concentration (0, 10, 100 and 1000  $\mu$ M) of butyrate. **b**, QRT-PCR of TNF $\alpha$ , IL-6, IL-1 $\beta$  and iNOS in

CD117<sup>-</sup> CD11b<sup>+</sup> CD115<sup>+</sup> Ly6C<sup>+</sup> BM monocytes after exposed to butyrate (200  $\mu$ M). Ctr., vehicle. **c**, QRT-PCR of arginase-1, Fizz1 and Ym1 in

CD117<sup>-</sup> CD11b<sup>+</sup> CD115<sup>+</sup> Ly6C<sup>+</sup> BM monocytes after exposed to butyrate (200  $\mu$ M). Ctr., vehicle.

**c**, QRT-PCR of arginase-1, Fizz1 and Ym1 in CD117<sup>-</sup> CD11b<sup>+</sup> CD115<sup>+</sup> Ly6C<sup>+</sup> BM monocytes after exposed to butyrate (200  $\mu$ M). Ctr., vehicle.

Two side Student's *t*-test in b and c.

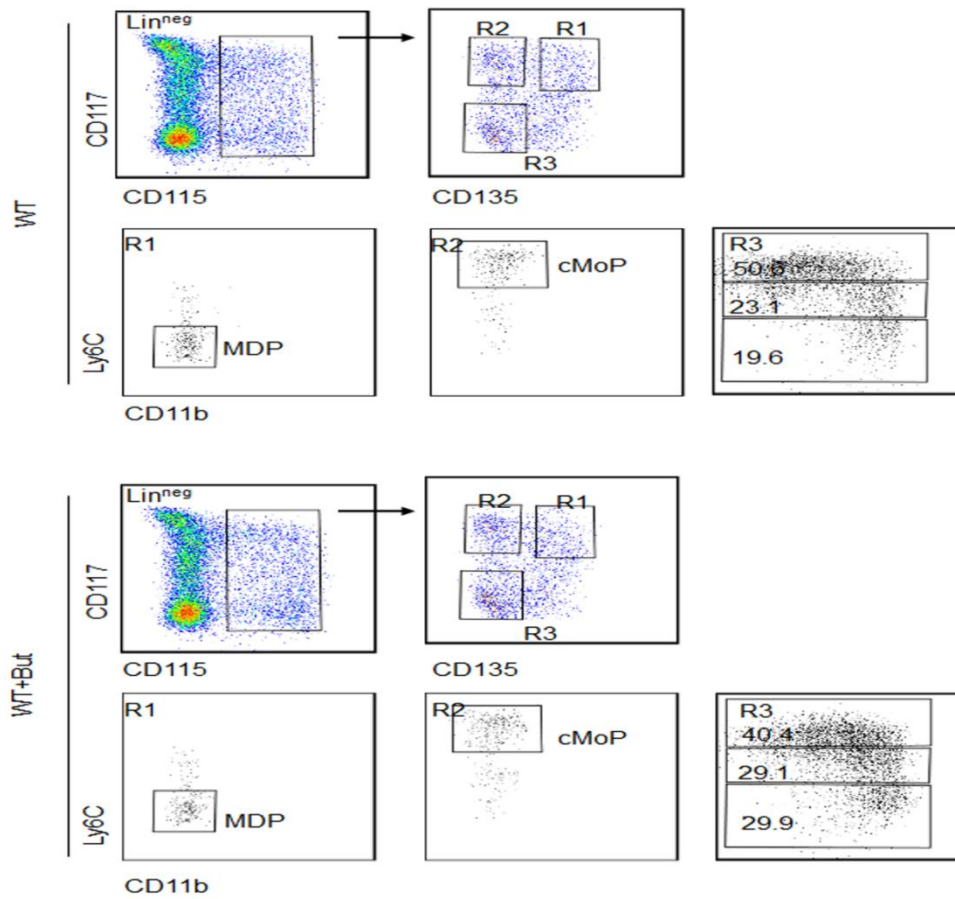

**Fig. S3. Flow cytometry of bone marrow cells in wild type mice with (WT+But) or without (WT) butyrate.** Mice received sodium butyrate (150 mM) in the drinking water for one week (n=5). One representative of 5 mice.

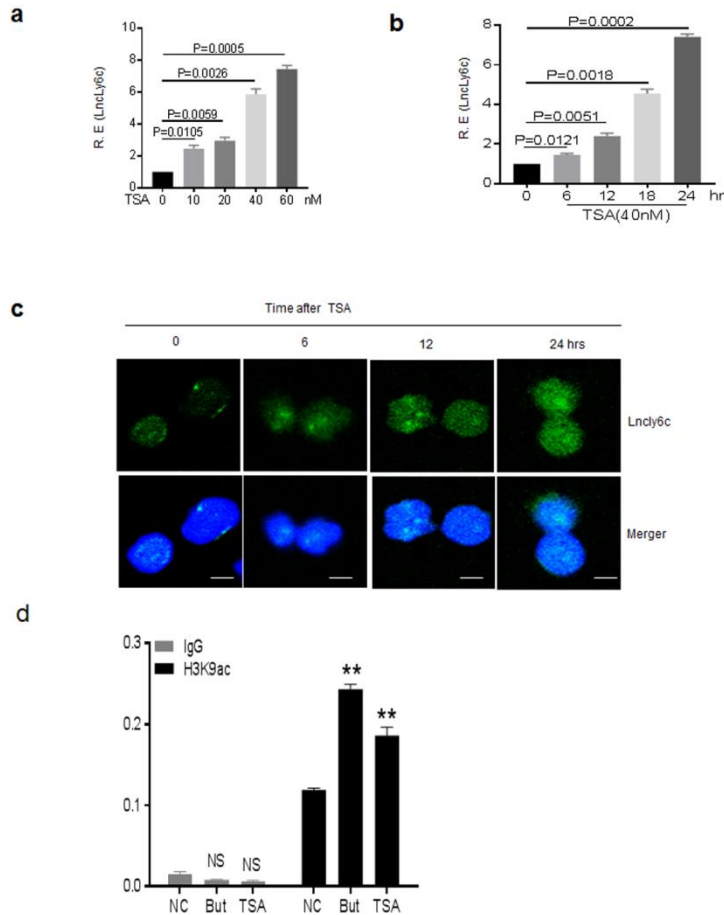

**Fig. S4. Trichostatin induces the expression of *lncLy6C*.** **a**, QRT-PCR of *lncLy6C* in BMDMs after exposed to different concentrations of Trichostatin A. R. E, relative expression. **b**, QRT-PCR of *lncLy6C* in BMDMs after exposed to Trichostatin A at different time points. R.E, relative expression. **c**, FISH of *lncLy6C* in BMDMs after exposed to Trichostatin A at different time points. Nuclei were stained with DAPI (blue); Green, lncLy6c. Scale bar, 2.5 $\mu$ M. **d**, Chip analyses in BMDMs after exposed to butyrate (200  $\mu$ M) or TSA (40nM, TSA) for 3 h. Samples were analyzed by ChIP using anti-H3K9Ac. Purified DNA was analyzed by qPCR using primers specific to the promoters of *lncLy6c*. IgG, isotypic antibody. % input was compared. ONE-way ANOVA and Bonferroni's Multiple Comparison Test in a and b. Two side Student's *t-test* in d.

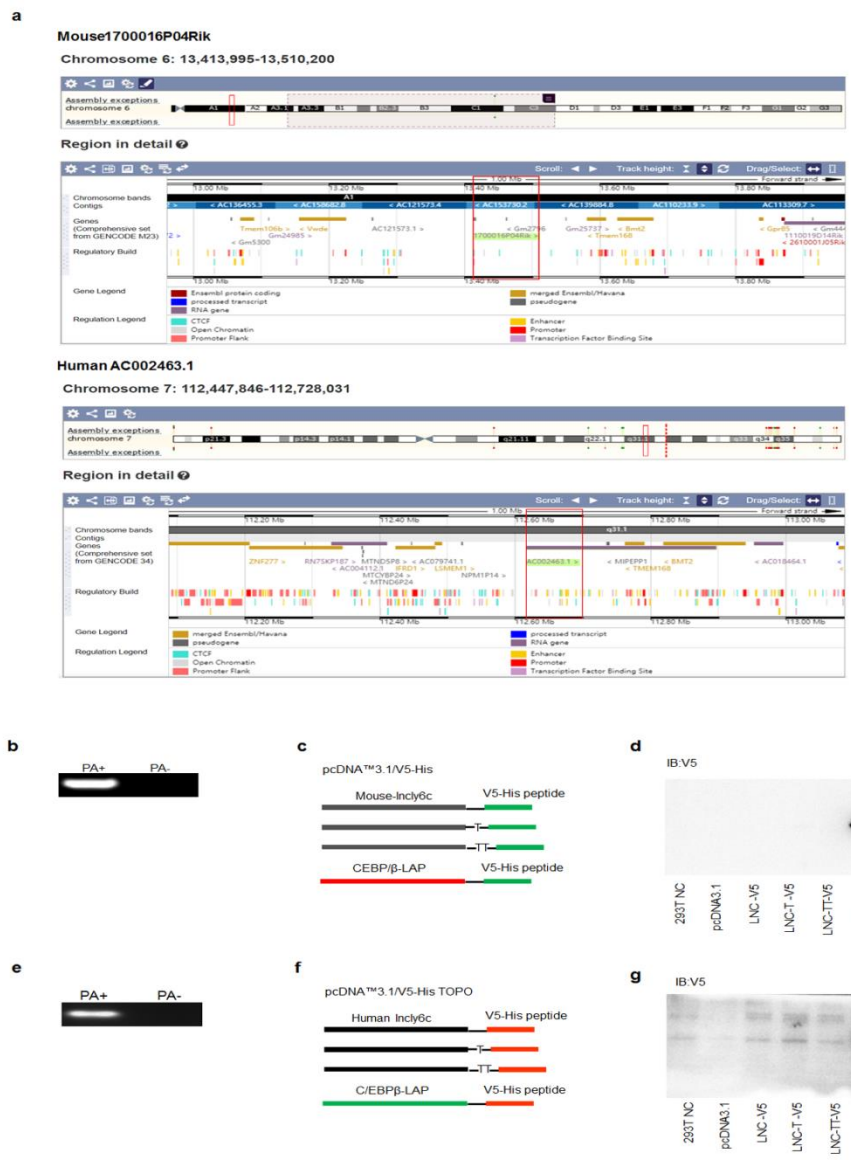

**Fig. S5. Characteristics of *lncLy6C*.** **a**, Location of mouse 1700016p04Rik (*lncLy6C*) and human AC0024631 (*Hu lncLy6C*). **b**, RT-PCR assay of mouse *lncLy6C* with polyA+ RNA. The polyA+ RNA fraction of mouse *lncLy6C* was examined using primer with poly-A (PA+) or primers without polyA (PA-). **c** and **d**, Immunoblotting of V5-tagged mouse *lncLy6C* transfected BMDMs. Full-length *lncLy6C* was cloned into pcDNA3.1 with N-terminal start codon ATG and C-terminal V5 tag in all three coding patterns (c), and then these plasmids subsequently were transfected into HEK293T cells separately, and after 48 hours, immunoblotting was used to detect the flag-tagged protein (d). C/EBPβ-LAP with V5 tag, a positive control (d). **e**, RT-PCR assay of hulncLy6C with polyA+ RNA. The polyA+ RNA fraction of hulncly6c was examined using primer with poly-A (PA+) or primers without polyA (PA-). **f** and **g**, Immunoblotting of V5-tagged human *HulncLy6C* transfected BMDMs. Full-length *Hu-lncly6c* was cloned into pcDNA3.1 with N-terminal start codon ATG and C-terminal V5 tag in all three coding patterns (f), and then these plasmids subsequently were transfected into HEK293T cells

separately, and after 48 hours, immunoblotting was performed using anti -flag antibody (g). C/EBP $\beta$  LAP with V5 tag, a positive control. No lncRNA encoding bands (around 20 kd) were found.

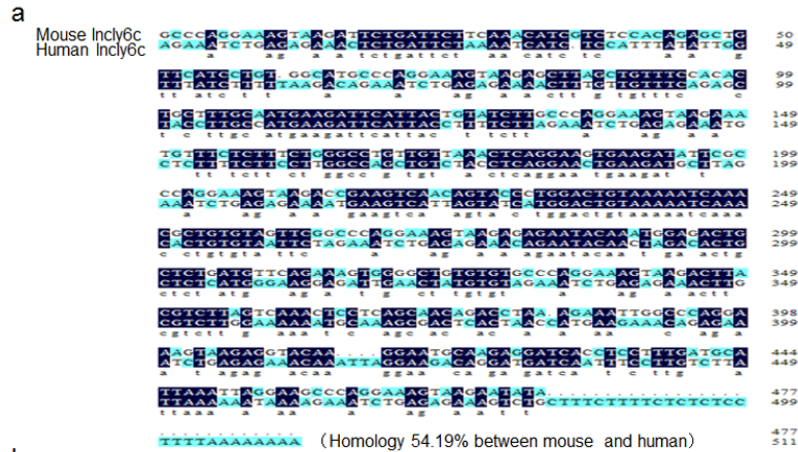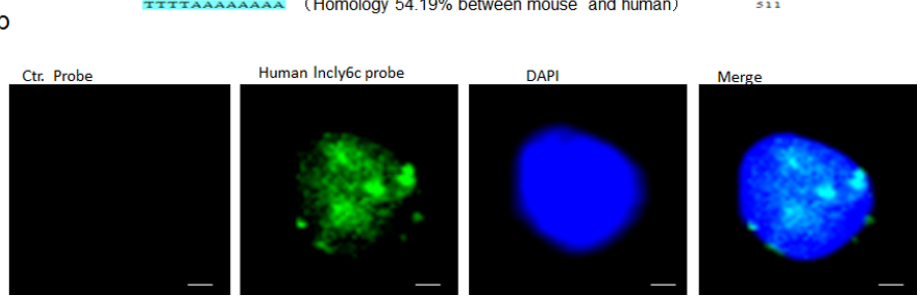

**Fig. S6. Homology of human *Incly6c* with mouse *Incly6c*.**  
**a**, Homology analyses between mouse *Incly6c* and human *Incly6c*. Higher homology (54.19%) between mouse *Incly6c* and human *hulncly6c* was shown.  
**b**, FISH of *hulncly6c* in CD14<sup>+</sup> human peripheral blood cells. Green, human *Incly6c*; Blue, DAPI; Scale bar, 2.5 μM.



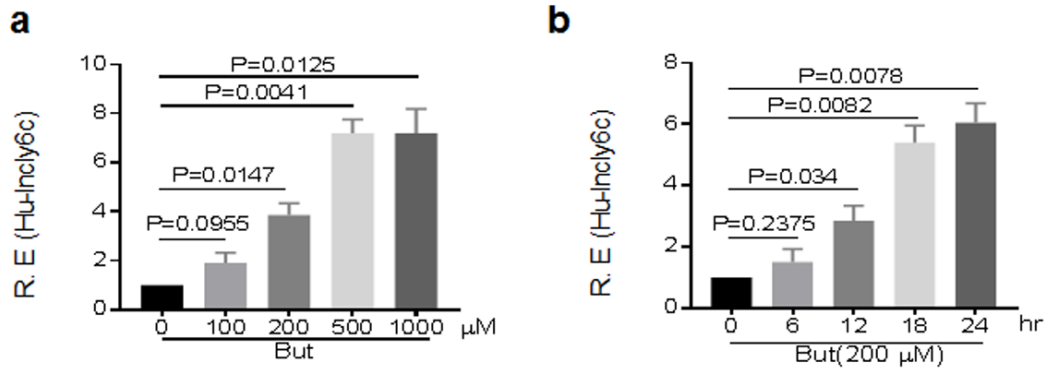

**Fig. S7. Expression of *lncLy6C* in human CD14+ monocytes after exposed to butyrate. a** QRT-PCR of *lncLy6C* in human CD14+ monocytes after exposed to different concentration of butyrate. R. E, relative expression. **b** QRT-PCR of *lncLy6C* in human CD14+ monocytes after exposed to butyrate (200 μM) at different time points. R. E, relative expression. Two side Student's *t-test*.

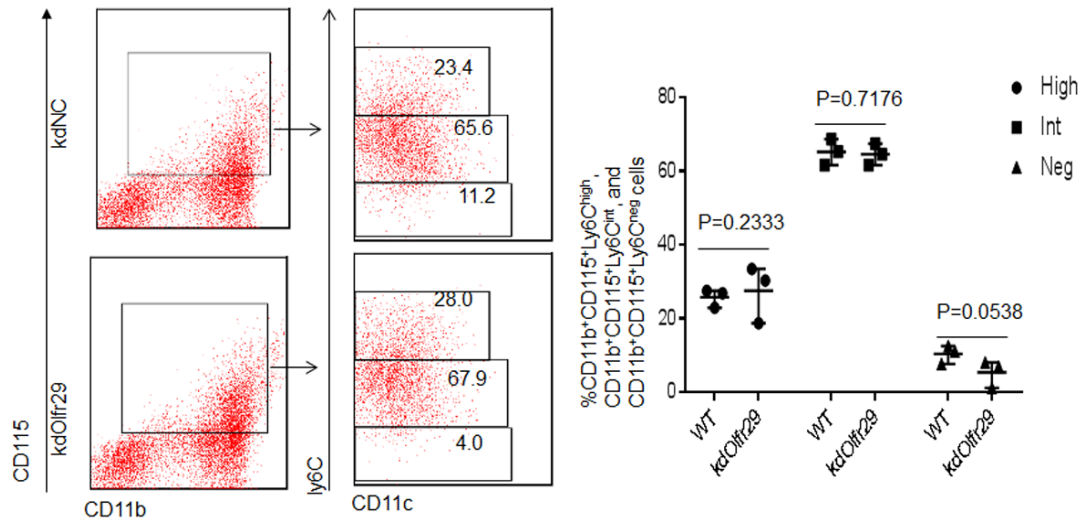

**Fig. S8.** Flow cytometry of CD11b<sup>+</sup>CD115<sup>+</sup>Ly6C<sup>high</sup>, CD11b<sup>+</sup>CD115<sup>+</sup>Ly6C<sup>int</sup>, CD11b<sup>+</sup>CD115<sup>+</sup>Ly6C<sup>neg</sup> cells in mouse BMC after silencing Olfr29-PS1 (kd Olfr29-PS1). Mouse BMCs were transfected by Olfr29-PS1 siRNA and then cultured for 4 days. KdNC, siRNA control. Two side Student's *t-test*.

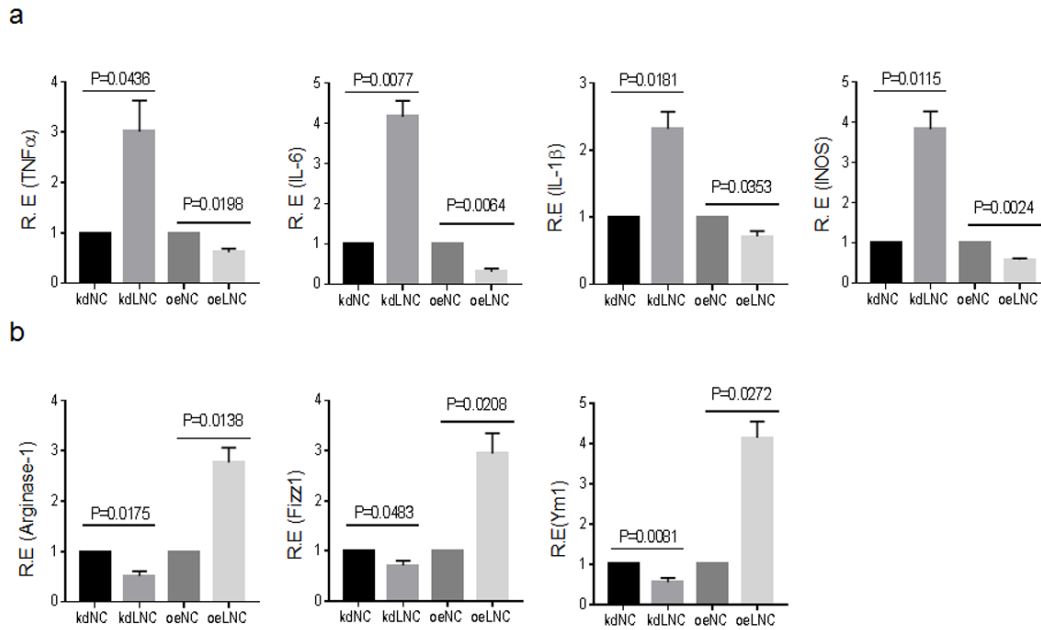

**Fig. S9. LncLy6c affects the expression of cytokines, iNOS, Arginase-1, Fizz1 and Ym1. a** QRT-PCR of TNF $\alpha$ , IL-6, IL-1 $\beta$  and iNOS in CD117 $^-$  CD11b $^+$  CD115 $^+$  Ly6C $^+$  BM monocytes after silencing Lncly6c or transfecting Lncly6c lentiviruses. **b** QRT-PCR of arginase-1, Fizz1 and Ym1 in CD117 $^-$  CD11b $^+$  CD115 $^+$  Ly6C $^+$  BM monocytes after after silencing Lncly6c or transfecting Lncly6c lentiviruses. kdNC, siRNA control; kdLNC, LncRNA siRNA; OcNC, empty lentivirus; OeLNC, LncRNA lentivirus. Two side Student's *t*-test.

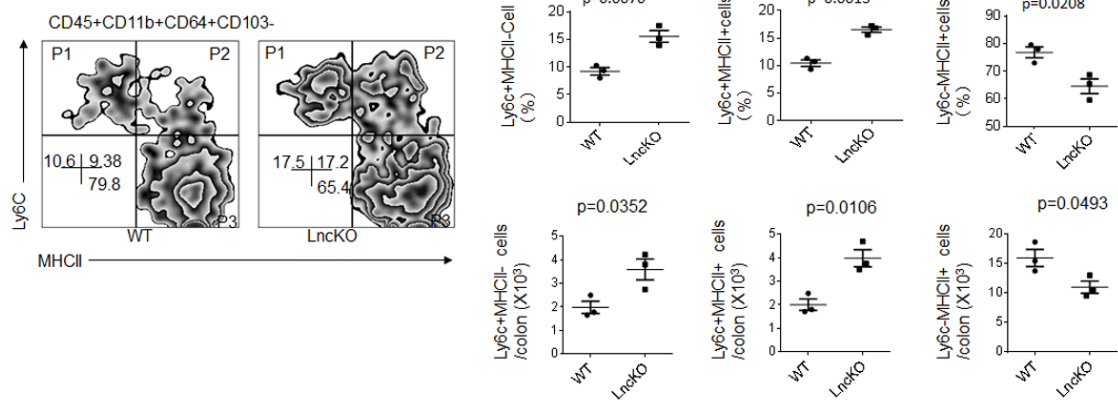

**Fig. S10. Flow cytometry of MHCII<sup>+</sup> Ly6C<sup>+</sup> inflammatory macrophages.**

CD45<sup>+</sup> CD11b<sup>+</sup> CD64<sup>+</sup> CD103<sup>-</sup> MHCII<sup>+</sup> Ly6C<sup>+</sup> cells in the colonic tissues of WT or Lncly6c KO mice (n = 6). % cells and total Ly6C<sup>+</sup> MHCII<sup>+</sup> cell number per colon were analyzed (right). Two side Student's *t*-test.

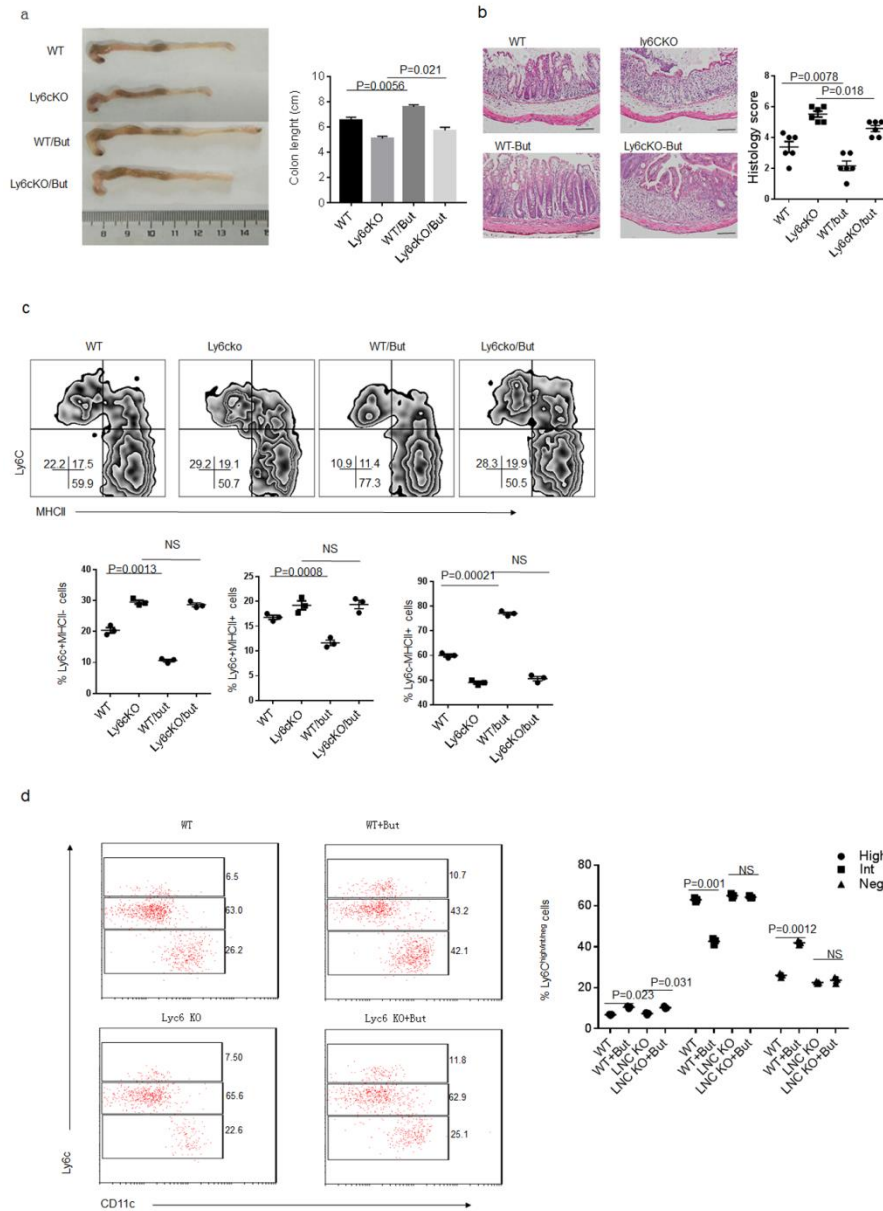

**Fig. S11. Butyrate promotes differentiation of Ly6c<sup>high</sup> inflammatory macrophages into Ly6c<sup>negative</sup> macrophages in DSS-treated WT but not *Lncly6c* KO mice.** **a** The length of colon in *LncLy6c* KO and WT mice with or without butyrate after DSS (2.5%) treatment (n=6). **b** H&E staining and histology score of colon tissues in *LncLy6c* KO and WT mice with or without butyrate after DSS (2.5%) treatment. For histological score, 3 slides/mouse, n=6. Scale bar, 40  $\mu$ M. **c** Flow cytometry of CD45<sup>+</sup>CD11b<sup>+</sup>CD64<sup>+</sup>CD103<sup>-</sup>MHC<sup>+</sup>Ly6C<sup>+</sup> in colon tissues in *Lncly6c* KO and WT mice with or without butyrate after DSS (2.5%) treatment (n=3).

**d** Flow cytometry of CD11b<sup>+</sup>CD115<sup>+</sup>Ly6C<sup>high</sup>, CD11b<sup>+</sup>CD115<sup>+</sup>Ly6C<sup>int</sup>, CD11b<sup>+</sup>CD115<sup>+</sup>Ly6C<sup>neg</sup> cells in lncLy6c KO and WT mice with or without butyrate after DSS (2.5%) treatment (n=3). Two side student's *t*-test; NS, no significance.

**Supplementary Table S1. Immunoprecipitation in BMDMs using anti-C/EBP $\beta$  antibody.**

| Description   | $\Sigma$ Coverage | Score<br>C/EBP $\beta$ Ab | Coverage<br>C/EBP $\beta$ Ab | Score<br>Isotypic Ab | Coverage<br>Isotypic Ab | MW<br>[kDa] | calc.<br>pI |
|---------------|-------------------|---------------------------|------------------------------|----------------------|-------------------------|-------------|-------------|
| C/EBP $\beta$ | 17.93             | 8.85                      | 17.93                        | 0                    | 0                       | 15.6        | 9.95        |
| ASH2L         | 2.43              | 2.43                      | 2.43                         | 0                    | 0                       | 60.1        | 6.95        |
| WDR5          | 17.07             | 10.32                     | 17.07                        | 0                    | 0                       | 36.6        | 8.27        |
| RNF2          | 2.68              | 2.68                      | 2.68                         | 0                    | 0                       | 37.6        | 6.84        |
| CXXC1         | 15.61             | 22.72                     | 11.06                        | 7                    | 8                       | 76.1        | 8.27        |

## Supplementary Table S2. Reagents and oligoes used in this study.

| REAGENT or RESOURCE                      | SOURCE                    | IDENTIFIER                     |
|------------------------------------------|---------------------------|--------------------------------|
| <b>Antibodies</b>                        |                           |                                |
| β-Actin Antibody                         | Santa Cruz                | Cat:sc-47778 RRID:AB_626632    |
| Anti-C/EBβ Antibody                      | Abcam                     | Cat:ab15050 RRID:AB_301598     |
| V5 Tag Monoclonal Antibody               | Thermo Fisher Scientific  | Cat:MA5-15253 RRID:AB_10977225 |
| Anti-Histone H3 (tri methyl K4) antibody | Abcam                     | Cat:ab8580 RRID:AB_306649      |
| WDR5 Rabbit mAb                          | Cell Signaling Technology | Cat:13105 RRID:AB_2620133      |
| Anti-Nr4a1 Antibody                      | Abcam                     | Cat:ab13851 RRID:AB_300679     |
| Anti-N6-methyladenosine (m6A) antibody   | Abcam                     | Cat:ab208577 RRID:AB_2753144   |
| Anti-METTL3 antibody                     | Abcam                     | Cat:ab195352 RRID:AB_2721254   |
| Anti-STAT3 (phospho Y705) antibody       | Abcam                     | Cat:ab76315 RRID:AB_1658549    |
| Anti-ASH2L antibody                      | Abcam                     | Cat:ab50699 RRID:AB_867739     |
| Anti-RbBP5 antibody                      | Abcam                     | Cat:ab52084 RRID:AB_882299     |
| Anti-DPY30 antibody                      | Abcam                     | Cat:ab126352 RRID:AB_11128034  |
| Anti-MLL1 (D2M7U) Rabbit antibody        | Cell Signaling Technology | Cat:14689 RRID:AB_2688009      |
| Rabbit Anti-CD11c antibody               | Bioss Inc                 | Cat: bs-2508R RRID:AB_10855986 |
| Rabbit Anti-CD4 antibody                 | Bioss Inc                 | Cat: bs-0766R RRID:AB_10857931 |
| Rabbit Anti-CD8 antibody                 | Bioss Inc                 | Cat: bs-0648R RRID:AB_10857537 |
| Rabbit Anti-CD19 antibody                | Bioss Inc                 | Cat: bs-0079R RRID:AB_10857264 |
| Rat Anti-Ly6C Monoclonal antibody        | Novus                     | Cat:NB100-65414 RRID:AB_964346 |
| F4/80 (6A545) antibody                   | Santa Cruz                | Cat:sc-71085 RRID:AB_1122717   |
| APC anti-mouse CD45.2 Antibody           | Biolegend                 | Cat: 109814 RRID:AB_389211     |
| APC anti-mouse CD11c Antibody            | Biolegend                 | Cat: 117310 RRID:AB_313779     |
| APC anti-mouse CD117 (c-Kit) Antibody    | Biolegend                 | Cat: 105812 RRID:AB_313221     |
| APC/Cy7 anti-mouse/human CD11b Antibody  | Biolegend                 | Cat: 101226 RRID:AB_830642     |
| PerCP anti-mouse/human CD11b Antibody    | Biolegend                 | Cat: 135506 RRID:AB_1937253    |
| FITC anti-mouse CD11c Antibody           | Biolegend                 | Cat: 117306 RRID:AB_313775     |
| FITC anti-mouse Ly-6C Antibody           | Biolegend                 | Cat: 128006 RRID:AB_1186135    |
| FITC anti-mouse CD3 Antibody             | Biolegend                 | Cat: 100204 RRID:AB_312661     |
| FITC anti-mouse CD19 Antibody            | Biolegend                 | Cat: 152404 RRID:AB_2629813    |
| FITC anti-mouse Gr-1 Antibody            | Biolegend                 | Cat: 108406 RRID:AB_313371     |
| PE anti-mouse CD115 (CSF-1R) Antibody    | Biolegend                 | Cat: 135506 RRID:AB_1937253    |
| PE/Cy5 anti-mouse CD135 Antibody         | Biolegend                 | Cat: 135312 RRID:AB_2263031    |
| PE/Cy7 anti-mouse Ly-6C Antibody         | Biolegend                 | Cat: 128017 RRID:AB_1732093    |
| <b>Bacterial and Virus Strains</b>       |                           |                                |



|                                               |                          |                                                     |
|-----------------------------------------------|--------------------------|-----------------------------------------------------|
| BL21 Chemically Competent cell                | TransGen Biotech         | Cat:CD901-01                                        |
| DH5α Chemically Competent cell                | Tiangen Biotech          | Cat:CD101-03                                        |
| Chemicals, Peptides, and Recombinant Proteins |                          |                                                     |
| Recombinant Murine GM-CSF                     | PeptoTech                | Cat:315-03                                          |
| Recombinant Murine M-CSF                      | PeptoTech                | Cat:315-02                                          |
| HiPerFect Transfection Reagent                | QIAGEN                   | Cat:301705                                          |
| Trichostatin A                                | MCE                      | Cat: HY-15144                                       |
| Pertussis Toxin                               | MCE                      | Cat: HY-112779                                      |
| Polybrene                                     | Millipore                | Cat:sc-134220                                       |
| Lipofectamine™ 3000 Transfection Reagent      | Thermo Fisher Scientific | Cat:11668027                                        |
| Trizol                                        | Life technologies        | Cat:15596018                                        |
| Oligonucleotides for clone genes              |                          |                                                     |
| Murine LncLy6C FW                             | BGI                      | 5'-GGTCGGAGTGGATGGCCC -3'                           |
| Murine LncLy6C REV                            | BGI                      | 5'-TATATTCCTAATTTAATGCATCAAAGG -3'                  |
| Human Lncly6C FW                              | BGI                      | 5'-GGAGTTGGCTGCCCAGAAATC-3'                         |
| Human Lncly6C REV                             | BGI                      | 5'-TAAAAGGAGAGAGAAAAGAAAGCAG-3'                     |
| Murine LncLy6C-L1 FW                          | BGI                      | 5'-GGATGGCCCAGGAAAGTAAGAC-3'                        |
| Murine LncLy6C-L2 FW                          | BGI                      | 5'-GTAAAAATCAAACGCTGTGTAG-3'                        |
| Murine LncLy6C-L3 FW                          | BGI                      | 5'-GTGTGTCTTACGTCTTAGTC-3'                          |
| Murine LncLy6C-L4 FW                          | BGI                      | 5'-ACAAGGAATGCAAGAGGATC-3'                          |
| Murine LncLy6C-MUT1 FW                        | BGI                      | 5'-CGAAGTCAACAGTACCCTGGGCTGTAAAAATCAAACGCTGTG-3'    |
| Murine LncLy6C-MUT1 REV                       | BGI                      | 5'-CACAGCGTTTGATTTTTACAGCCCAGGGTACTGTGACTTCG-3'     |
| Murine LncLy6C-MUT2 FW                        | BGI                      | 5'-CGAAGTCAACAGTACCCTGGTCTGTAAAAATCAAACGCTGTG-3'    |
| Murine LncLy6C-MUT2 REV                       | BGI                      | 5'-CACAGCGTTTGATTTTTACAGACCAGGGTACTGTGACTTCG-3'     |
| Murine LncLy6C-MUT3 FW                        | BGI                      | 5'-CGAAGTCAACAGTACCCTGGGCTGTAAAAATCAAACGCTGTG-3'    |
| Murine LncLy6C-MUT3 REV                       | BGI                      | 5'-CACAGCGTTTGATTTTTACAGCCAGGGTACTGTTGACTTCG-3'     |
| Murine LncLy6C-MUT4 FW                        | BGI                      | 5'-AGTTCGGAGAATACAAATGGGGACTGCTCTGATGTTTACAGAAAG-3' |
| Murine LncLy6C-MUT4 REV                       | BGI                      | 5'-CTTTCTGAACATCAGAGCAGTCCCCATTTGTATTC TCCGAACT-3'  |
| Murine LAP* FW                                | BGI                      | 5'-GCCACCATGCACCGCTGCTGGCCTGGGACG-3'                |
| Murine LAP* REV                               | BGI                      | 5'-GCAGTGGCCCGCCGAGGCCA-3'                          |

|                              |     |                                              |
|------------------------------|-----|----------------------------------------------|
| Murine LAP FW                | BGI | 5'-GCCACCATGGAAGTGGCCAACCTCTACTACGAG<br>C-3' |
| Murine LAP REV               | BGI | 5'-GCAGTGGCCCGCCGAGGCCA-3'                   |
| Murine LIP FW                | BGI | 5'-GCCACCATGGCGGCCGTTTCCCGTTTCG-3'           |
| Murine LIP REV               | BGI | 5'-GCAGTGGCCCGCCGAGGCCA-3'                   |
| Murine Δ LAP* FW             | BGI | 5'-GCCACCATGCACCGCTGCTGGCCTGGGACG-3'         |
| Murine Δ LAP* REV            | BGI | 5'-GGCGGGCGCGTCTGCCGCGCTTG-3'                |
| Murine Δ LAP FW              | BGI | 5'-GCCACCATGGAAGTGGCCAACCTCTACTACGAG<br>C-3' |
| Murine Δ LAP REV             | BGI | 5'-GGCGGGCGCGTCTGCCGCGCTTG-3'                |
| Murine WDR5 FW               | BGI | 5'-GCCACCATGGCCACAGAGGAGAAGAAGC-3'           |
| Murine WDR5 REV              | BGI | 5'-GCAGTCACTCTTCCACAGTTTGATT-3'              |
| Murine ASH2L FW              | BGI | 5'-GCCACCATGGCGGCGGCTGGAGCGGGT-3'            |
| Murine ASH2L REV             | BGI | 5'-GGTTCACAGGGTGGACTACGTCTT-3'               |
| Murine DPY30 FW              | BGI | 5'-GCCACCATGGAGTCGGAGCAGATGCTGGAGG-3'        |
| Murine DPY30 REV             | BGI | 5'-ATTTCGATCTTCAAACCTGCGCTTG-3'              |
| Murine RBBP5 FW              | BGI | 5'-GCCACCATGAACCTCGAGTTGCTGGAGTCT-3'         |
| Murine RBBP5 REV             | BGI | 5'-CAGCAGTTCTGAGATGGCTCCTCT-3'               |
| Oligonucleotides for qRT-PCR |     |                                              |
| Murine GAPDH FW              | BGI | 5'-TCAACGGCACAGTCAAGG-3'                     |
| Murine GAPDH REV             | BGI | 5'-TACTCAGCACCGGCTCA-3'                      |
| Murine Arg1 FW               | BGI | 5'-CTGACCTATGTGTCATTTGGG-3'                  |
| Murine Arg1 REV              | BGI | 5'-TCAGGAGAAAGGACACAGTT-3'                   |
| Murine INOS FW               | BGI | 5'-CTTGGAGCGAGTTGTGGATTGT-3'                 |
| Murine INOS REV              | BGI | 5'-AGGTGAGGGCTTGGCTGAGTGA-3'                 |
| Murine TNFa FW               | BGI | 5'-CCAGACCCTCACACTCAGATCA-3'                 |
| Murine TNFa Rev              | BGI | 5'-GTAGACAAGGTACAACCCATCG-3'                 |
| Murine IL-1b FW              | BGI | 5'-GCAGGCAGTATCACTCATTGTG-3'                 |
| Murine IL-1b Rev             | BGI | 5'-AGGCTTTTTTGTGTTTCATCTC-3'                 |
| Murine IL-6 FW               | BGI | 5'-ACAACCACGGCCTTCCCTACTT-3'                 |
| Murine IL-6 Rev              | BGI | 5'-TTTCTATTTCCACGATTTCCC-3'                  |
| Murine Fizz1 FW              | BGI | 5'-AGACTACAACCTGTTCCCTTCT-3'                 |
| Murine Fizz1 Rev             | BGI | 5'-GTTCTTGACCTTATTCTCCAC-3'                  |
| Murine YM-1 Fw               | BGI | 5'-CGTAATCAAGTCTGGGTACAAG-3'                 |
| Murine YM-1 Rev              | BGI | 5'-AGGGTCACTCAGGATAAAGGTA-3'                 |
| Murine Nr4A1 Fw              | BGI | 5'-TGAGTTCGGCAAGCCTACCAT-3'                  |
| Murine Nr4A1 Rev             | BGI | 5'-GGAGGAGGCAGAGGAACAAGC-3'                  |
| Murine LncLy6C FW            | BGI | 5'-CCCAGGAAAGTAAGACCA-3'                     |
| Murine LncLy6C REV           | BGI | 5'-TTTAACAACAGGCCAGA-3'                      |
| Human Lncly6C FW             | BGI | 5'-AGACATGTAAGTCTGCTCACC-3'                  |
| Human Lncly6C REV            | BGI | 5'-CTTCATAAGCATCTCAGTCTCT-3'                 |
| Murine Gm8883 FW             | BGI | 5'-GTCTTGTGTGTGCTAGCTCTCT-3'                 |
| Murine Gm8883 REV            | BGI | 5'-CTGTCCTGGAACCTACTCTGTA-3'                 |
| Murine 5730403107Rik FW      | BGI | 5'-AAGGGAACCTCACGGTGGT-3'                    |

|                                          |     |                                                         |
|------------------------------------------|-----|---------------------------------------------------------|
| Murine 5730403107Rik REV                 | BGI | 5'-TGATGTTTCAGCGAGGGA-3'                                |
| Murine Efcab8 FW                         | BGI | 5'-TGTGCCTACTGCTCTTCTTCCC-3'                            |
| Murine Efcab8 REV                        | BGI | 5'-TGCCTCCTTCTCAAACACCTTC-3'                            |
| Murine Meg3 FW                           | BGI | 5'-TTGAAATAAAGGAGTGACAGAA -3'                           |
| Murine Meg3 REV                          | BGI | 5'-CCCAGAATAAGATGAGCAGAAG-3'                            |
| Murine Olfr29-ps1 FW                     | BGI | 5'-GACATCTGCTACACCACCTCCT-3'                            |
| Murine Olfr29-ps1 REV                    | BGI | 5'-CGATCAAACGCCATCATACTCA-3'                            |
| Murine 4930528A17Rik FW                  | BGI | 5'-AGTTCTGGAAGCAGGGTGTG-3'                              |
| Murine 4930528A17Rik REV                 | BGI | 5'-CTTTTACCTCTTTTCGGGAGGC-3'                            |
| Murine BC021767 FW                       | BGI | 5'-AGCAGGGAGGGAACATTATGGG -3'                           |
| Murine BC021767 REV                      | BGI | 5'-TGAGAGTAAAGCAGCAAGGCAG -3'                           |
| Murine 1500009C09Rik FW                  | BGI | 5'-TTCTGTCCCTCTCTGTTGC-3'                               |
| Murine 1500009C09Rik REV                 | BGI | 5'-GGTGAGCGGGGCTGATCTATA-3'                             |
| Murine Gm5468 FW                         | BGI | 5'-TTGCTTGTCTGCTTCGTCCT-3'                              |
| Murine Gm5468 REV                        | BGI | 5'-CCTTTGGCATTTCGTCCTCA-3'                              |
| Murine Gm5105 FW                         | BGI | 5'-CAGAGAGCGTGGTAGAGGATT-3'                             |
| Murine Gm5105 REV                        | BGI | 5'-GGAAGAGACAAAGGGGACAT-3'                              |
| Murine Speer5-ps1 FW                     | BGI | 5'-ACAAGCAAGAAGCAGTTTGAG-3'                             |
| Murine Speer5-ps1 REV                    | BGI | 5'-GCTGGCAGGTTACGATAGAA-3'                              |
| Oligonucleotides used in 5'- and 3'-RACE |     |                                                         |
| Murine LncLy6C 5'RACE                    | BGI | 5'-CAATTTCTTAGGTCTGTTGCT -3'                            |
| Murine LncLy6C 3'RACE                    | BGI | 5'-ATCTTAATGTTTCTTTCTGG -3'                             |
| UPM long primer for 5'RACE               | BGI | 5'-TAATACGACTCACTATAGGGCAAGCAGTGGTAT<br>CAACGCAGAGT-3'  |
| UPM short primer for 5'RACE              | BGI | 5'-CTAATACGACTCACTATAGGGC-3'                            |
| Oligonucleotides used in CHIP-RCR        |     |                                                         |
| Nr4A1-H3K4me3 FW for CHIP-PCR            | BGI | 5'-CCTCCTCTGGCCGCTCCC-3'                                |
| Nr4A1-H3K4me3 REV for CHIP-PCR           | BGI | 5'-AGCACACTCCCCAACTTTC-3'                               |
| Lncly6C-H3K9ac FW for CHIP-PCR           | BGI | 5'-GCCCAGGAAAGTAAGACCATAGC-3'                           |
| Lncly6C-H3K9ac REV for CHIP-PCR          | BGI | 5'-ACAACAGGCCAGAAAGAGAAAC-3'                            |
| C/EBPβ FW for CHIP-PCR                   | BGI | 5'-TCCACAAACAGAAAGCCTACCT -3'                           |
| C/EBPβ REV for CHIP-PCR                  | BGI | 5'-ACCTTCCCAGTGCAACCCAAT -3'                            |
| Oligonucleotides used in Northern blot   |     |                                                         |
| T7- Murine LncLy6C -FW                   | BGI | 5'-CTGATTCTTCAAACATCGTCTC-3'                            |
| T7- Murine LncLy6C-REV                   | BGI | 5'-<br>TAATACGACTCACTATAGGGCATTCTGTACCCAA<br>TTTCTT -3' |
| T7-U6 RNA-FW                             | BGI | 5'-GTGCTCGCTTCGGCAGCACATATAC-3'                         |
| T7-U6 RNA-REV                            | BGI | 5'-TAATACGACTCACTATAGGGAAAAATATGGAAC<br>GCTTCACGAATT-3' |
| Probes used in the RNA-FISH              |     |                                                         |
| Murine LncLy6C-FAM                       | BGI | 5'-FAM-AAGCATCTTCAGTTCTGAGGTAGA -3'                     |
| Human LncLy6C-FAM                        | BGI | 5'-FAM-ATTTTTTCCAAGACGCAAGACACAT-3'                     |

|                                            |                                |                                     |
|--------------------------------------------|--------------------------------|-------------------------------------|
| NC-FAM                                     | BGI                            | 5'-FAM--CGGGAGCCTAGGAAGTGATCTTTC-3' |
| siRNAs used in this study                  |                                |                                     |
| Murine LncLy6C                             | Ribobio                        | 5'-CCTCAGCAACAGACCTAAA-3'           |
| Mettl3 siRNA-1                             | Ribobio                        | 5'-GCTACCGTATGGGACATTA -3'          |
| Mettl3 siRNA-2                             | Ribobio                        | 5'-CCGCAAGATTGAGTTATTT -3'          |
| Other                                      |                                |                                     |
| pcDNA™3.1/V5-His TOPO® TA Expression Kit   | Invitrogen                     | Cat: K4800-40                       |
| Pierce™ Magnetic RNA-Protein Pull-Down Kit | Thermo<br>Fisher<br>Scientific | Cat:20164                           |
| Dual-Luciferase® Reporter Assay System     | Promega                        | Cat: E1960                          |
| DIG Northern Starter Kit                   | Roche                          | Cat:12039672910                     |
| Pierce™ Protein G Agarose                  | Thermo<br>Fisher<br>Scientific | Cat: 20397                          |
| FirstChoice RLM-RACE Kit                   | Ambion                         | Cat: AM1700                         |
| EZ-ChIP™Chromatin Immunoprecipitation Kit  | Millipore                      | Cat:17-371                          |
